# Supplementary material for: Gene expression, proteome and calcium signaling alterations in immortalized hippocampal astrocytes from an Alzheimer’s disease mouse model
Source: PubMed Central journal article supplement (PMC6328590; doi:10.1038/s41419-018-1264-8), 2019-01-10
Supplement: 41419_2018_1264_MOESM1_ESM.pdf [file 41419_2018_1264_MOESM1_ESM.pdf]

## SUPPLEMENTARY MATERIAL

### Gene expression, proteome and calcium signaling alterations in immortalized hippocampal astrocytes from an Alzheimer's disease mouse model.

Francesca Rocchio, Laura Tapella, Marcello Manfredi, Mariangela Chisari, Francesca Ronco, Federico Alessandro Ruffinatti, Eleonora Conte, Pier Luigi Canonico, Maria Angela Sortino, Mariagrazia Grilli, Emilio Marengo, Armando A Genazzani and Dmitry Lim

#### Index

| File or Table          | Content                                                                                      |
|------------------------|----------------------------------------------------------------------------------------------|
| Supplementary Material | Oligonucleotide primers used for real-time PCR                                               |
| Supplementary Figure 1 | GLT-1 expression and glutamate uptake                                                        |
| Supplementary Figure 2 | LPS-induced iNOS and TNF $\alpha$ mRNA levels                                                |
| Supplementary Figure 3 | TGF $\beta$ mRNA levels in WT-iAstro and 3Tg-iAstro lines                                    |
| Supplementary Table 1  | List of detected proteins in WT- and 3Tg-iAstro lines                                        |
| Supplementary Table 2  | Comparison of our dataset with datasets of Hanrieder et al., 2011 and Yang et al., 2005      |
| Supplementary Table 3  | List of differentially expressed proteins between WT- and 3Tg-iAstro immortalized astrocytes |
| Supplementary Table 4  | Gene ontology analysis                                                                       |
| Supplementary Table 5  | String k-means clustering analysis                                                           |

**Oligonucleotide primers used for quantitative real-time PCR.**

| <b>Gene</b>    | <b>Accession number</b> | <b>Forward<br/>Reverse</b> | <b>Sequence 5' to 3'</b>                       |
|----------------|-------------------------|----------------------------|------------------------------------------------|
| Trim12a        | NM_023835.2             | Forward<br>Reverse         | TCATTGAAGAGGTGGCCCAG<br>ACCGAACATTCTGCACATCT   |
| Ccl27a (Pesky) | NM_001048179.1          | Forward<br>Reverse         | TCTCCAACAAGCCAGAGACT<br>GCTTGGGAGTGGCTGTCTAT   |
| Car9           | NM_139305.2             | Forward<br>Reverse         | GGAGTCCCTTGGGTTAGAGG<br>TGGGGCCAGAGTAGGGTG     |
| Ptchd2         | NM_001083342.1          | Forward<br>Reverse         | CACAGCCTGCAGAACAATGT<br>TTGGAGATGTACACGGTGCT   |
| Slc2a4         | NM_009204.2             | Forward<br>Reverse         | TAAAACAAGATGCCGTCGGG<br>CCAAACTGAAGGGAGCCAAG   |
| P2ry2          | NM_008773.3             | Forward<br>Reverse         | ATCCTCACCACCTCAAGAGC<br>GGCAACAGCACGTACTIONGAA |
| Panx1          | NM_019482.2             | Forward<br>Reverse         | TCACATGTATTGCCGTGGGT<br>CTCGGGGAGAAGCAGCTTAT   |
| Cacna2d3       | NM_009785.1             | Forward<br>Reverse         | TGCCTGTGAACATCAGTCTGA<br>GCCATATGAGAGACGGATCCC |
| Fbln2          | NM_007992.2             | Forward<br>Reverse         | GGGCACTCACGATTGTAGCT<br>GCAGGTCTGTACACACTCA    |
| Col2a1         | NM_001113515.2          | Forward<br>Reverse         | GTGAGCCATGATCCGCCTC<br>GGTTCTCCTTTCTGCCCTT     |
| Padi2          | NM_008812.2             | Forward<br>Reverse         | GGGAAAATATGCTGCGGGAAC<br>CACCTTCCGAGTGCTTCAGG  |
| Pcdh17         | NM_001013753.2          | Forward<br>Reverse         | CTAATTCGAGCGAGACCCCT<br>CTCTCAGGCTGGCTCTTTCT   |
| Samd4          | NM_001037221.2          | Forward<br>Reverse         | TTGTGCCTCAGTATGACGGA<br>AACCCTGAAGATGGCTGACA   |
| Col4a6         | NM_053185.2             | Forward<br>Reverse         | CAAGCATGCACCCTGGATTG<br>AGACTCCATGGCAATCTCGG   |
| P2ry1          | NM_008772               | Forward<br>Reverse         | TCAAGCAGAATGGAGACACG<br>CTCACTCAGGTGGCACACAC   |
| iNOS           | NM_010927.4             | Forward<br>Reverse         | GCCACCAACAATGGCAACA<br>CGTACCGGATGAGCTGTGAATT  |
| Tgfb2          | NM_009367.3             | Forward<br>Reverse         | AGGCAGAGTTCAGGGTCTTC<br>CCTTGCTATCGATGTAGCGC   |
| Tgfb3          | NM_009368.3             | Forward<br>Reverse         | AGGAGACCTCGGAGTCTGAG<br>CACTGAGGACACATTGAAACGA |
| S18            | NM_213557               | Forward<br>Reverse         | TGCGAGTACTCAACACCAACA<br>CTGCTTTCCTCAACACCACA  |



**A**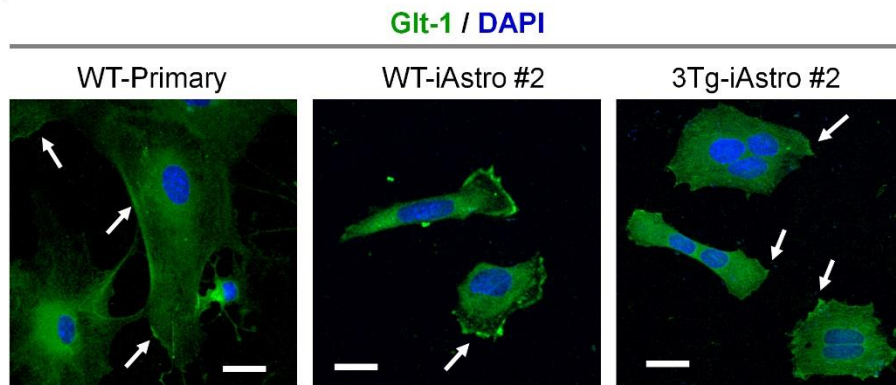**B**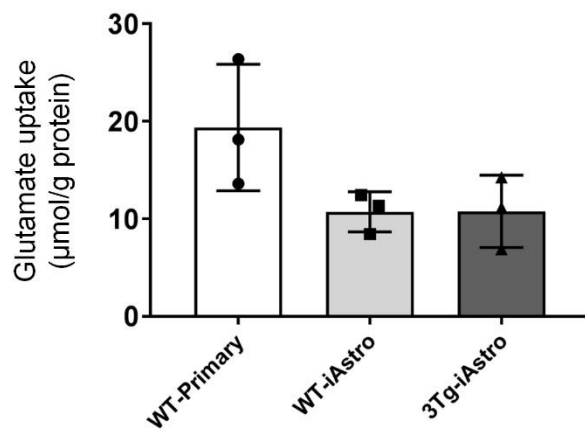

**Supplementary Figure 1. iAstro express membrane-localized GLT-1 and are capable of glutamate uptake.** **A**, membrane localization of GLT-1 in primary WT astrocytes and in WT-iAstro#2 and 3Tg-iAstro#2. The images are representative of 3 independent experiments. Similar staining was observed in other independently generated iAstro lines. Bar, 20 µm. **B**, Glutamate uptake was measured as described in Methods section in WT-primary and WT- and 3Tg-iAstro cells. The data are expressed as mean ± SD of experiments performed in triplicate for 3 independent cultures of WT primary astrocytes and WT-iAstro#2 and 3Tg-iAstro#2. ANOVA, followed by Tukey's post-hoc test was used for statistical analysis. The differences were not significant at  $p < 0.05$ .

**A**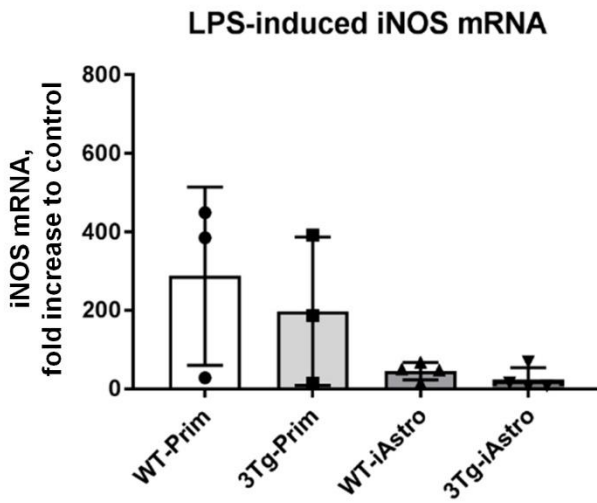**B**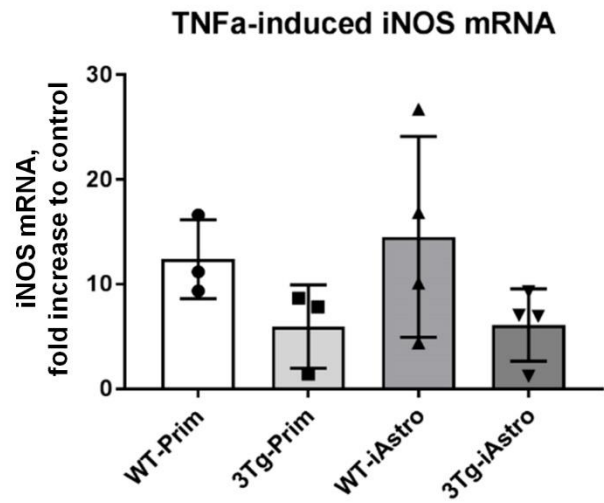

**Supplementary Figure 2. LPS and TNF $\alpha$ -induced iNOS mRNA in WT- and 3Tg primary and immortalized astrocytes.** Induction of iNOS upon treatment of primary and immortalized astrocytes from WT and 3xTg-AD mice with LPS (**A**) (100 ng/ml for 3h) or TNF $\alpha$  (**B**) (20 ng/ml 6h). Data are expressed as mean  $\pm$  SD of iNOS mRNA fold increase as compared to WT cells of 3 independent cultures for primary astrocytes and 4 independently generated iAstro lines (WT-iAstro#2,#3,#5 and #6, and 3Tg-iAstro#2,#3,#4 and #6). ANOVA, followed by Tukey's post-hoc test was used for statistical analysis. The differences were not significant at  $p < 0.05$ .

**A**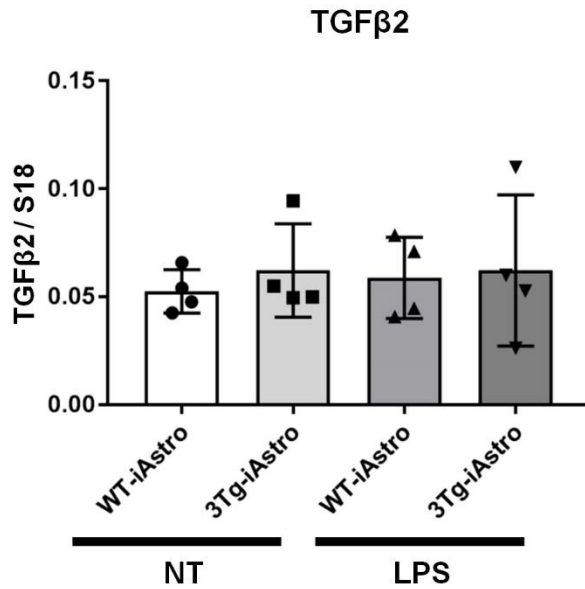**B**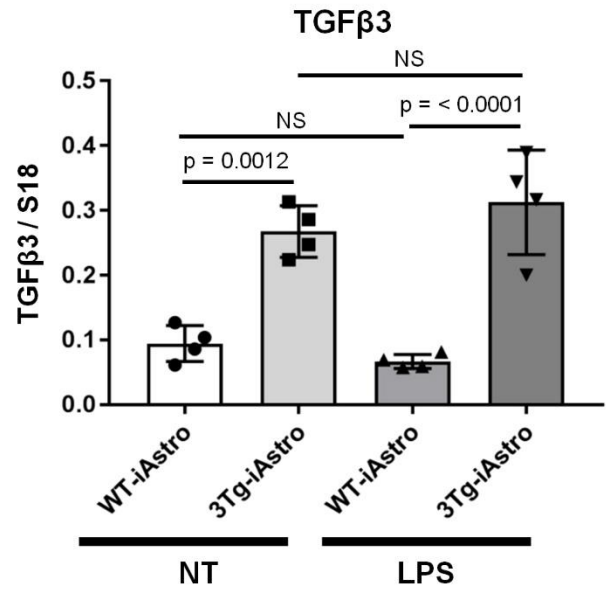

**Supplementary Figure 3. TGFβ2 and TGFβ3 mRNA levels in WT-iAstro and 3Tg-iAstro.** TGFβ2 (A) and TGFβ3 (B) mRNA levels were measured by real-time PCR in control non treated (NT) and LPS-treated (100 ng/ml, 3h) WT-iAstro and 3Tg-iAstro lines. Data are expressed as mean ± SD of  $\Delta C(t)$  TGFβ/S18 mRNA of 4 independently generated iAstro lines (WT-iAstro#2,#3,#5 and #6, and 3Tg-iAstro#2,#3,#4 and #6). ANOVA, followed by Tukey's post-hoc test was used for statistical analysis. Where not indicated, the differences were not significant at  $p < 0.05$ .
